# Supplementary material for: Extremely low catalyst loading for electroless deposition on a non-conductive surface by a treatment for reduced graphene oxide
Source: Royal Society of Chemistry journal article supplement (doi:10.1039/c7cc03773b), 2017-01-01
Supplement: c7cc03773b1.pdf [file c7cc03773b1.pdf]

## Electronic Supplementary Information (ESI)

### **Extremely low catalyst loading for electroless deposition on non-conductive surface by a treatment for reduced graphene oxide**

Jing Zhan<sup>a</sup>, Desmond C. L. Tan<sup>a</sup>, Swaek Prakrititanon<sup>b</sup>, Lim Ming<sup>c</sup>, Hirotaka Sato<sup>a</sup>

<sup>a</sup>School of Mechanical & Aerospace Engineering, Nanyang Technological University, 50 Nanyang Avenue, Singapore 639798

<sup>b</sup>Okuno-Auromex Co., Ltd. Bangoo Industrial Estate, 392 Moo 4, Soi Pattana 3, Sukhumvit Saikao Road, Praksa Sub-district, Muang, Samut Prakan Province 10280, Thailand

<sup>c</sup>Institute of Materials Research and Engineering, A\*STAR, 2 Fusionopolis Way. Innovis, #08-03, Singapore 138634

## **EXPERIMENT**

### **Apparatus:**

The microstructures of reduced graphene oxide (rGO) and Pd nanoparticles were observed using transmission electron microscopy (TEM) operated at 200 kV. The graphitic structures of GO and rGO were characterised by an X-ray diffractometer (PANalytical Empyrean) and Raman spectroscopy (stellar-Pro ML150 laser, Renishaw 633 nm HeNe laser and Leica DM 2500M microscope). The amount of deposited Pd nanoparticles (Pd loading) was determined using an inductively coupled plasma mass spectrometer (ICP-MS). Ni deposition was monitored by a quartz crystal microbalance (QCM, Seiko Eg&G QCM922A) with a SiO<sub>2</sub>-coated Au resonator at a basic frequency of 8.9 MHz (Seiko Eg&G QA-A9M SIO2-S). The sheet resistances of polyimide substrate with/without rGO coating is measured by four-point probe tester.

### **Chemicals:**

Graphene oxide (GO) solution (dispersion in water, 2 mg/ml), sodium hypophosphite monohydrate (NaH<sub>2</sub>PO<sub>2</sub>·H<sub>2</sub>O), palladium(II) chloride (PdCl<sub>2</sub>), sodium citrate dehydrate (HOC(COONa)(CH<sub>2</sub>COONa)<sub>2</sub> · 2H<sub>2</sub>O), boric acid (H<sub>3</sub>BO<sub>3</sub>) nickel(II) sulphate hexahydrate (NiSO<sub>4</sub> · 6H<sub>2</sub>O) and sodium hydroxide (NaOH) were purchased from Sigma-Aldrich. The GO solution was diluted to 0.2 mg/ml with deionised (DI) water.

**Reduced graphene oxide (rGO) pre-treatment:**

A SiO<sub>2</sub>-coated AT-cut quartz crystal substrate was washed with ethanol and left to dry in air. The washed and dried substrate was dipped into the diluted GO solution (0.2 mg/ml) for 1 min. The substrate was then air-blown and dried to remove the excess solution adhered to it. It was then dipped into a NaH<sub>2</sub>PO<sub>2</sub> solution (0.2 M) for 1 min, resulting in the reduction of GO to rGO. The above-mentioned sequence was repeated five times.

**Pd catalyst loading on a QCM substrate:**

The rGO-coated substrate was dipped into PdCl<sub>2</sub> (1.5 mM or 30 µM with 1% HCl) for 10 s followed by dipping into NaH<sub>2</sub>PO<sub>2</sub> (0.2 M), in sequence, for 10 s. The substrate was air-blown after every step. The stepwise Pd catalyst loading process was repeated twice; then the substrate was washed with DI water and dried by air blow.

**In situ measurement of Ni deposition by QCM:**

The rGO-coated and Pd-nanoparticle-deposited QCM substrate was assembled with Dip Cell (Seiko Eg&G QA-CL3) before electroless Ni deposition. The assembled unit was immersed in NaH<sub>2</sub>PO<sub>2</sub> for 7 mins to maintain the activity of the Pd nanoparticles under aqueous conditions before testing. The Ni bath solution for electroless Ni deposition contained 0.2 M sodium citrate, 0.5 M boric acid, 15 g/L Nickel (II) sulphate hexahydrate and 25 g/L sodium hypophosphite monohydrate. The pH of the Ni bath solution was adjusted to 9.0 by NaOH. During the QCM measurement, the assembled Dip Cell with quartz substrate was immersed in the Ni bath solution to detect the frequency change during electroless deposition, and the temperature of the Ni bath solution was maintained at 60 °C. In addition, as blank sample, a quartz substrate was treated by 2 cycles of Pd (in 30 µM PdCl<sub>2</sub> solution) then dipped into the bath solution whose composition, pH and temperature were the same as those of the Ni bath solution except that Nickel (II) sulphate hexahydrate was not contained.

We used QCM to measure the amount of Ni deposited during the Ni electroless deposition [1-3]. The deposition of Ni changes the mass of the substrate, which is detected by calculating the decrease in the frequency of the quartz by the QCM using the Sauerbrey equation [4]. The mass activity is expressed as the mass of Ni deposited,  $m_{Ni}$ , normalised by the loading of Pd nanoparticles,  $m_{Pd}$  [5], using the following equation:

$$\text{Mass Activity} = \frac{m_{Ni}}{m_{Pd}}.$$

The Pd loading, or  $m_{Pd}$ , was measured by ICP-MS.

### Characterisation of the rGO reduced by $\text{NaH}_2\text{PO}_2$ :

Since rGO deposited on quartz substrate is not thick enough for XRD and Raman spectroscopy, the reduction of GO by  $\text{NaH}_2\text{PO}_2$ , GO (2 mg/ml) and  $\text{NaH}_2\text{PO}_2$  (0.2 M) was tested after mixing with a ratio 1:9 to obtain a sufficient amount of rGO mixture in solution. The mixture gel was separated from water by centrifugation and filtration. Subsequently, the mixture was dried in a drybox for XRD and Raman spectroscopy in order to characterise the graphitic structure. The same amount of GO (2 mg/mL) was also dipped on glass slices and put in a drybox to obtain GO powder.

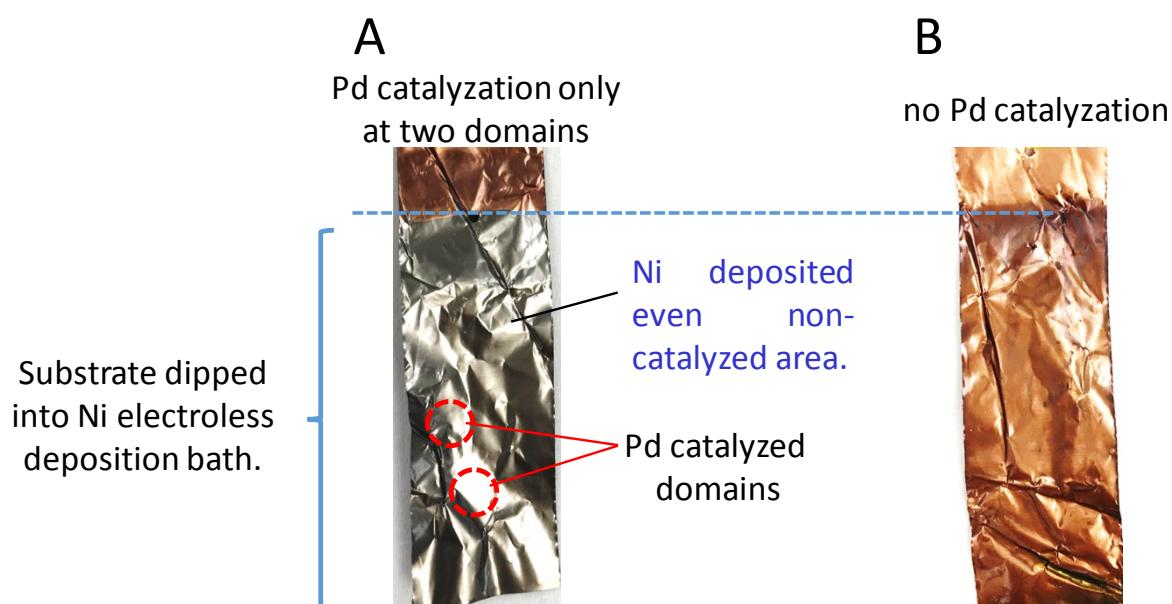

**Figure S1:** On conductive substrate, electroless deposition takes place widely everywhere, regardless of the Pd-catalysed position. For (A), only two domains (indicated by red dot circles) on copper foil were Pd-catalysed. Then, the copper foil was dipped into the electroless deposition bath (see the experimental section). Since the copper foil is conductive, electroless deposition occurred not only at the Pd-catalysed domains but everywhere on the foil (see Figure 1A as well). Note that the electroless deposition did not occur blank substrate without Pd catalyzation as in (B). Since the Ni redox potential is lower than Cu, Ni does not deposit on Cu substrate via galvanic displacement deposition. In addition, as is well-known, since Cu does not catalyse the oxidation of  $\text{NaH}_2\text{PO}_2$ , the reducing agent used in the deposition bath, Ni electroless deposition does not occur on Cu substrate by  $\text{NaH}_2\text{PO}_2$  [6].

**Movie S1:** rGO treatment enables sufficient Ni electroless deposition on a polyimide substrate, even with extremely low Pd loading. The right sample, 3.2ppm Pd with rGO (see Table 1), was well coated with Ni while much less Ni deposited on the left sample, 3.2ppm Pd (no rGO). The playback speed is x128.

## References

1. Matsubara, H., et al., *The observation of the nucleation and growth of electrolessly plated nickel deposited from different bath pH by TEM and QCM method*. Electrochimica Acta, 2006. **52**(2): p. 402-407.
2. Ashassi-Sorkhabi, H., M. Moradi-Haghighi, and M.G. Hosseini, *Effect of rare earth (Ce, La) compounds in the electroless bath on the plating rate, bath stability and microstructure of the nickel-phosphorus deposits*. Surface & Coatings Technology, 2008. **202**(9): p. 1615-1620.
3. Ashassi-Sorkhabi, H., A. Mirmohseni, and H. Harrafi, *Evaluation of initial deposition rate of electroless Ni-P layers by QC method*. Electrochimica Acta, 2005. **50**(28): p. 5526-5532.
4. Bard, A.J. and L.R. Faulkner, *Fundamentals and applications*. Electrochemical Methods, 2nd ed.; Wiley: New York, 2001.
5. Lee, C.L., Y.L. Tsai, and C.W. Chen, *Specific and mass activity of silver nanocube and nanoparticle-based catalysts for electroless copper deposition*. Electrochimica Acta, 2013. **104**: p. 185-190.
6. Barke, H.-D., A. Hazari, and S. Yitbarek, *Acid–Base Reactions*, in *Misconceptions in chemistry*. 2009, Springer. p. 173-206.
